# Supplementary material for: Transcriptome and Co-expression Network Analyses Reveal Differential Gene Expression and Pathways in Response to Severe Drought Stress in Peanut (Arachis hypogaea L.)
Source: Front Genet. 2021 Apr 30;12:672884. doi: 10.3389/fgene.2021.672884 (PMC8120245; doi:10.3389/fgene.2021.672884)
Supplement: Supplementary Table 1 — Sequences of the primers used in this study. [file Table_1.XLSX]

## Sheet: Sheet1
Table S1. Sequences of the primers used in this study.
Primer name		Primer Sequence
arahy.Tifrunner.gnm1.ann1.30ZBSQ	F	ACGACAATAGTAATCAGCAGCATGG
	R	TGATGAAGAACCACCCCCTAAC
arahy.Tifrunner.gnm1.ann1.LQA0WQ	F	CTTTGGAGGTGACAGGATTGGA
	R	GCAGAGATGGCAGGACACTTG
arahy.Tifrunner.gnm1.ann1.ZPNH9W	F	GGTGGAAAAGGTGAAACAGGG
	R	GATTGGTTATGGACGGCAGCA
arahy.Tifrunner.gnm1.ann1.333C3Q	F	TTCGTGGATGCGGATAAGGA
	R	CCAATCAATCCCCCAACTCT
arahy.Tifrunner.gnm1.ann1.EDW718	F	CCACCTCTGTCGTCGTCTTC
	R	CCTCACCACCCTCTTCAACC
arahy.Tifrunner.gnm1.ann1.P4KHGY	F	GGAGAATACCAGACCCAGGA
	R	ATGTCCCAATCAGCACCAAC
arahy.Tifrunner.gnm1.ann1.0HE1Z7	F	CAGAGCATTTCCCGCCTTTG
	R	CGTTCCTCCTGTTGTCTCGT
arahy.Tifrunner.gnm1.ann1.D15G2D	F	CAGGTAGCAGGGAAGGATTCA
	R	AGTTTGTCGGCGTGTTGAGA
arahy.Tifrunner.gnm1.ann1.GQZA4M	F	TAAAGAAGCGTGTGGAGCGG
	R	TGAACGAGGCATAACTGGGC
actin	F	AAGATGGCAGATGGTGAGGA
	R	CTCCGTTAGAAGCACAGGGT
